# Supplementary material for: Mesothelin-specific T cell cytotoxicity against triple negative breast cancer is enhanced by 40s ribosomal protein subunit 3-treated self-differentiated dendritic cells
Source: PubMed Central journal article supplement — Oncol Rep. 2022 May 25;48(1):127. doi: 10.3892/or.2022.8338 (PMC9164262; doi:10.3892/or.2022.8338), 2022-05-25

Figure S1. The T cell subsets and MSLN-specific T cells frequency analysis in activated T cells. (A) Frequency of CD4<sup>+</sup> and CD8<sup>+</sup> T cells at day 15 of the experiment. The frequency of naïve (CD45RA<sup>+</sup> CD62L<sup>+</sup>), central memory T cells (TCM; CD45RA<sup>-</sup> CD62L<sup>+</sup>), TEM (CD45RA<sup>-</sup> CD62L<sup>-</sup>) and (B) TEMRA (CD45RA<sup>+</sup> CD62L<sup>-</sup>) gated from CD4<sup>+</sup> and CD8<sup>+</sup> T cells. MSLN, mesothelin; TEM, effector memory T cells; TEMRA; TEM re-expressing CD45RA; PBMC, peripheral blood mononuclear cells.

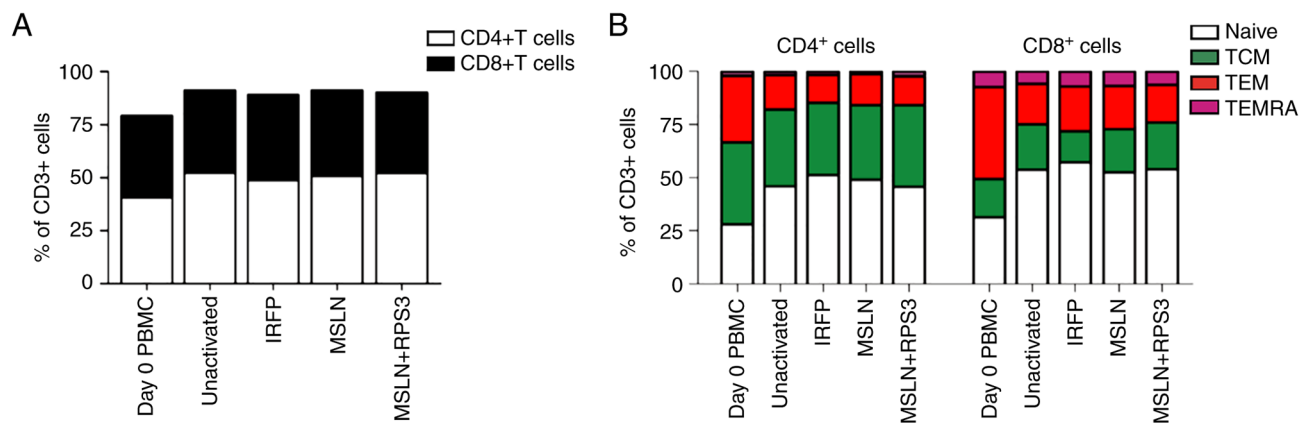

Supplement: Supplementary_Data.pdf [file Supplementary_Data.pdf]
